# Supplementary material
Source: Springer Nature journal article supplement (https://www.springermedizin.de/resource/supplementary/12935_2011_325_MOESM3_ESM.pdf/9540368)

Propidium iodide

Control

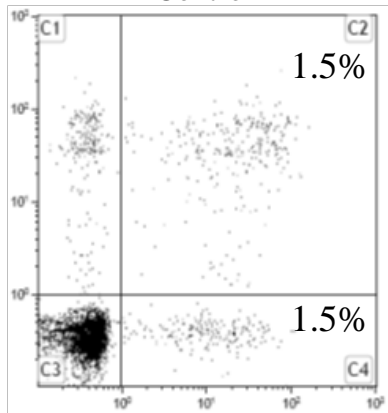

#8

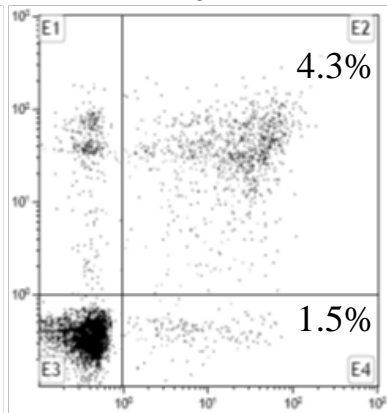

#13

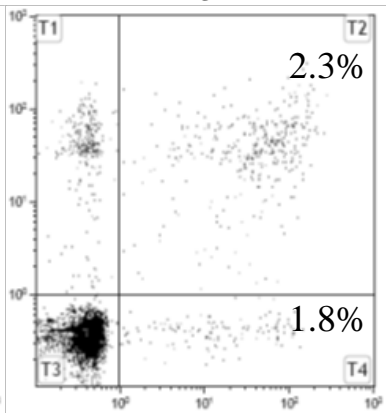

Annexin V-FITC

Supplement: MOESM3 [file 9540368]
